# Supplementary material for: A graph neural network (GNN) approach to basin-scale river network learning: the role of physics-based connectivity and data fusion
Source: Copernicus journal article supplement (doi:10.5194/hess-26-5163-2022), 2022-10-14
Supplement: Supplementary file 1 [file hess-26-5163-2022-supplement.pdf]

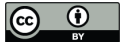

*Supplement of*

## **A graph neural network (GNN) approach to basin-scale river network learning: the role of physics-based connectivity and data fusion**

**Alexander Y. Sun et al.**

*Correspondence to:* Alexander Y. Sun ([alex.sun@beg.utexas.edu](mailto:alex.sun@beg.utexas.edu))

The copyright of individual parts of the supplement might differ from the article licence.

## 1 Fig S1. PRISM annual data

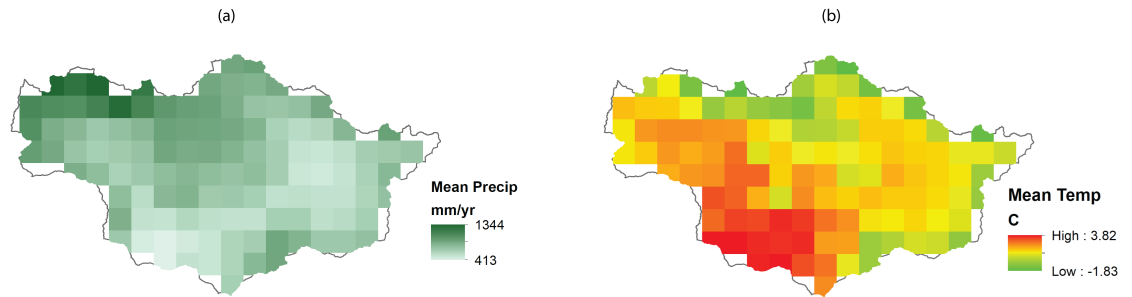

Figure 1: PRISM 30-year mean (a) precipitation and (b) air temperature for the East Taylor Watershed.

## 2 Fig S2. GraphWaveNet (GWN-O) trained without using antecedent NWM outputs as predictors

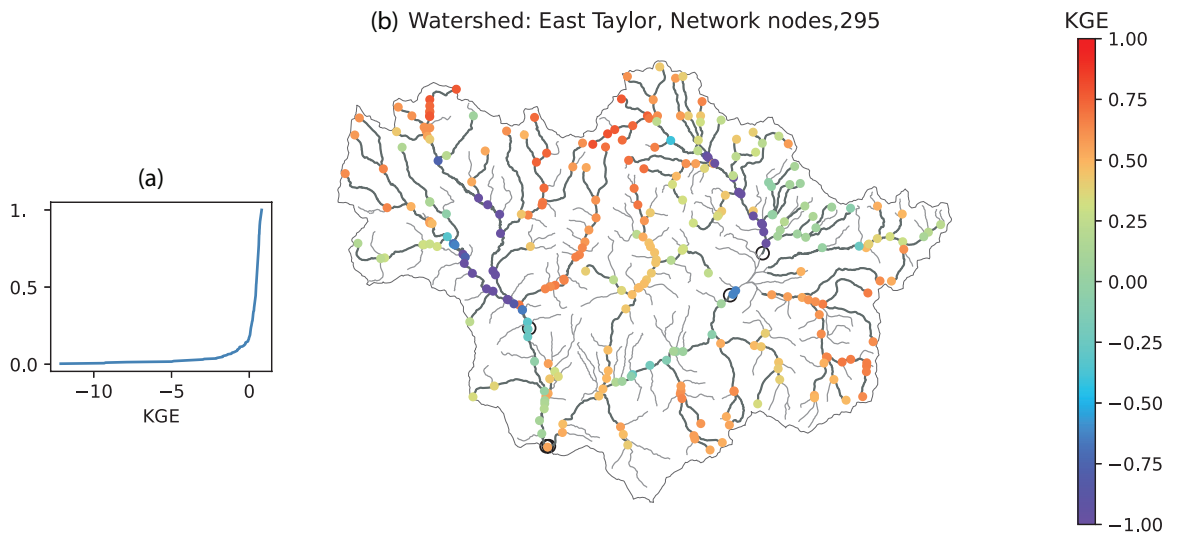

Figure 2: KGE of the GWN-O model trained using only Daymet meteorological forcing. Median KGE=0.433, mean KGE=0.065

## 3 Fig S3. Sensitivity study using NWM2.1 data

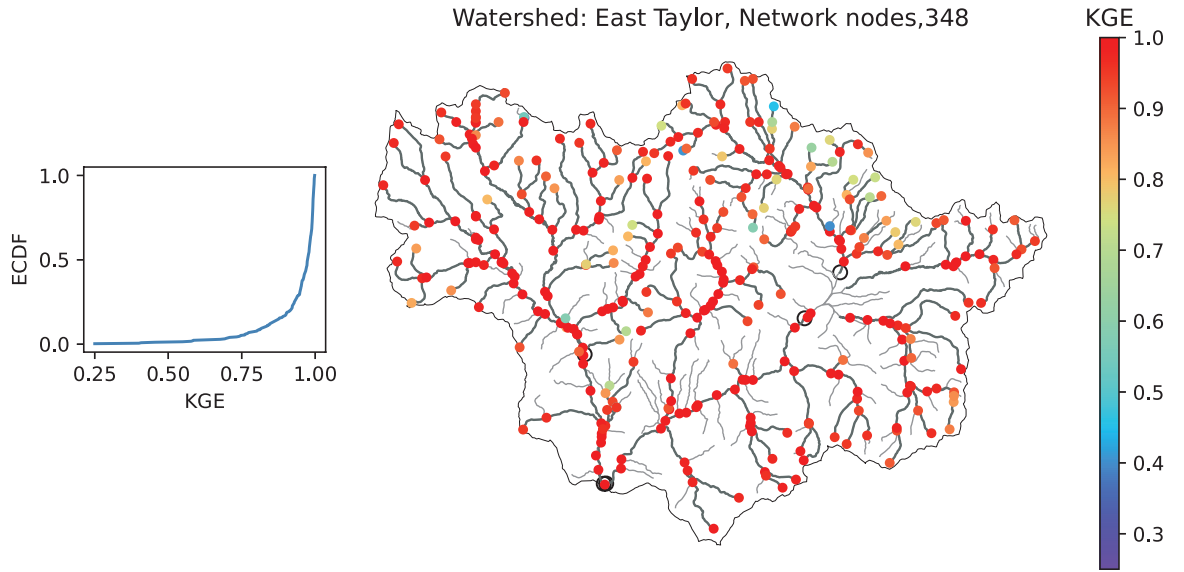

Figure 3: KGE of the GWN-O model trained using NWM2.1 data. Median of KGE = 0.974, mean of KGE=0.937.

## 4 Data fusion on the GWN-Impute model

Table 1: Results of leave-one-out cross validation using the five USGS gages (boldface numbers indicate better performance).

| USGS<br>Gage | NWM<br>COMID | KGE          |                |                |
|--------------|--------------|--------------|----------------|----------------|
|              |              | NWM          | GWN-<br>Impute | Data<br>Fusion |
| 09107000     | 1333022      | 0.563        | 0.567          | 0.567          |
| 09112200     | 1333198      | 0.332        | 0.330          | <b>0.695</b>   |
| 09112500     | 1333418      | 0.355        | 0.353          | <b>0.666</b>   |
| 09109000     | 1333490      | 0.425        | 0.425          | <b>0.879</b>   |
| 09110000     | 1333564      | <b>0.616</b> | 0.613          | 0.508          |

## 5 Data fusion on the GWN-O model without using NWM

Table 2: Results of leave-one-out cross validation using the five USGS gages (boldface numbers indicate better performance).

| USGS<br>Gage | NWM<br>COMID | KGE          |        |                |
|--------------|--------------|--------------|--------|----------------|
|              |              | NWM          | GWN-O  | Data<br>Fusion |
| 09107000     | 1333022      | 0.563        | -2.465 | -2.465         |
| 09112200     | 1333198      | 0.332        | 0.667  | <b>0.860</b>   |
| 09112500     | 1333418      | 0.355        | 0.611  | <b>0.707</b>   |
| 09109000     | 1333490      | <b>0.425</b> | -0.042 | 0.334          |
| 09110000     | 1333564      | 0.616        | 0.426  | <b>0.690</b>   |

## 6 Testing result on Gunnison River Basin models

Table 3: Comparison of KGE statistics of the Gunnison River Basin GNN models

| Model          | Mean  | Median | Min   | Max   |
|----------------|-------|--------|-------|-------|
| GWN            | 0.825 | 0.907  | 0.150 | 0.995 |
| GWN-<br>Impute | 0.810 | 0.904  | 0.111 | 0.998 |
